# Supplementary material for: Comparison of whole-genome bisulfite sequencing library preparation strategies identifies sources of biases affecting DNA methylation data
Source: Genome Biol. 2018 Mar 15;19:33. doi: 10.1186/s13059-018-1408-2 (PMC5856372; doi:10.1186/s13059-018-1408-2)
Supplement: Supplementary file 1 — An Excel spreadsheet with three tabs listing 1) datasets generated in this study, 2) datasets used from the publically domain, together with key parameters, and 3) number of datasets used per analysis. (XLSX 21 kb) [file 13059_2018_1408_MOESM1_ESM.xlsx]

## Sheet: Datasets summary (this study)
Datasets generated for this study, main methylation parameters and sequencing identifiers
#	ID	Sample		TKO mESC			M13 spike-in		Cytosines	Reads raw	Reads mapped	Index
			meCG	meCHG	meCHH	meCG	meCHG	meCHH
1	Alkaline_1*	mouse TKO ESC	0.015	0.012	0.014	0.009	0.043	0.009	797875899	43550536	25706647	iPCRtag5
2	Alkaline_2	mouse TKO ESC	0.037	0.031	0.043	0.024	0.062	0.032	591047706	53352216	21512207	iPCRtag6
3	Alkaline_3	mouse TKO ESC	0.064	0.049	0.064	0.056	0.093	0.053	306352227	19181199	10631667	iPCRtag5
4	Heat_1	mouse TKO ESC	0.004	0.003	0.003	0.004	0.037	0.005	363486295	23023141	12739381	iPCRtag3
5	Heat_2	mouse TKO ESC	0.036	0.041	0.053	0.03	0.075	0.042	420538553	27694619	14780658	iPCRtag2
6	Heat_3	mouse TKO ESC	0.003	0.003	0.003	0.003	0.04	0.005	292618699	18529470	10754487	iPCRtag4
7	meTKO_1	mouse TKO ESC	0.152	0.164	0.211	-	-	-	493007675	21081894	15637183	iPCRtag8
8	meTKO_2	mouse TKO ESC	0.222	0.226	0.224	-	-	-	548721774	23736266	17407472	iPCRtag9
9	non-BS_1	mouse ESC	-	-	-	-	-	-	-	12146237	11981285	TruSeq 1
10	non-BS_2	mouse ESC	-	-	-	-	-	-	-	5780209	5704071	TruSeq 2
11	non-BS_3	mouse ESC	-	-	-	-	-	-	-	41959144	41571952	TruSeq 3
12	non-BS_4	mouse ESC	-	-	-	-	-	-	-	6276251	6153750	TruSeq 4
13	non-BS_5	mouse ESC	-	-	-	-	-	-	-	18807369	18640535	TruSeq 5
14	non-BS_6	mouse ESC	-	-	-	-	-	-	-	11645963	11479933	TruSeq 6
15	non-BS_7	mouse ESC	-	-	-	-	-	-	-	4830978	4764287	TruSeq 7
16	non-BS_8	mouse ESC	-	-	-	-	-	-	-	5417154	5337274	TruSeq 8
17	non-BS_9	mouse ESC	-	-	-	-	-	-	-	28757705	28518415	TruSeq 9
* published in Raddatz et al. 2013

## Sheet: Datasets parameters
Summary of datasets analysed in this study and their library preparation parameters.
White background marks pre-bisulfite protocols, light blue – post-bisulfite, and light pink – non-BS converted control datasets.
Study nomenclature' marks which protocol each study was used for.
Publication	WGBS approach	WGBS method	In-study nomenclature	BS conversion protocol	Amplification (cycles)	Polymerase	Number of datasets
Ficz et al. 2013	Pre-bisulfite	BS-seq	'Heat'	Heat	Yes (16)	Pfu Turbo Cx	7
This study	Pre-bisulfite	BS-seq	'Heat'	Heat	Yes (15)	Pfu Turbo Cx	5
Feichtinger et al. 2016	Pre-bisulfite	BS-seq	'Heat'	Heat	Yes (10)	Pfu Turbo Cx	7
Kobayashi et al. 2012	Pre-bisulfite	BS-seq	'Heat'	Heat	Yes (15-25)	Hot Start Taq	30
Milagre et al. 2017	Pre-bisulfite	BS-seq	'Heat KAPA'	Heat	Yes (11)	KAPA HiFi Uracil+	27
Raine et al. 2017	Pre-bisulfite	BS-seq	'Heat KAPA'	Heat	Yes (6)	KAPA HiFi Uracil+	4
Berrens et al. 2017	Pre-bisulfite	BS-seq	'Heat KAPA'	Heat	Yes (11)	KAPA HiFi Uracil+	9
Seisenberger et al. 2012	Pre-bisulfite	BS-seq	'Alkaline'	Alkaline	Yes (18)	Pfu Turbo Cx	14
This study	Pre-bisulfite	BS-seq	'Alkaline'	Alkaline	Yes (15)	Pfu Turbo Cx	3
Patalano et al. 2015	Pre-bisulfite	BS-seq	'Alkaline KAPA'	Alkaline	Yes (15)	KAPA HiFi Uracil+	7
Bonasio et al. 2012	Pre-bisulfite	BS-seq	'Am-BS'	Am-BS	Yes (9)	JumpStart Taq	10
Wang et al. 2014	Pre-bisulfite	BS-seq	'Am-BS'	Am-BS	Yes (9)	JumpStart Taq	4
Miura et al. 2012	Post-bisulfite	PBAT	'PBAT'	Heat	None†	-	2
Kobayashi et al. 2012	Post-bisulfite	PBAT	'PBAT'	Heat	None†	-	4
Shirane et al. 2013	Post-bisulfite	PBAT	'PBAT'	Heat	None†	-	30
Okae et al. 2014	Post-bisulfite	PBAT	'PBAT'	Heat	None†	-	17
Smallwood et al. 2014	Post-bisulfite	PBAT	'ampPBAT'	Alkaline‡	Yes (9-12)†	KAPA HiFi	6
Peat et al. 2014	Post-bisulfite	PBAT	'ampPBAT'	Alkaline‡	Yes (9-12)†	KAPA HiFi	4
Dai et al. 2016	Post-bisulfite	PBAT	'ampPBAT'	Heat	Yes (5-6)†	KAPA HiFi	4
Milagre et al. 2017	Post-bisulfite	PBAT	'ampPBAT'	Heat	Yes (10)†	KAPA HiFi	9
Farlik et al. 2015	Post-bisulfite	modified PBAT	'EpiGnome'	Heat	Yes (10)†	FailSafe	10
Raine et al. 2017	Post-bisulfite	modified PBAT	'EpiGnome'	Heat	Yes (9)†	FailSafe	4
This study	non-bisulfite NGS	-	'non-BS control'	Not converted	Yes (6)	NEB Next 2x Phusion	9
† Include one (ampPBAT-Heat, Epignome), three (PBAT) or five (ampPBAT-Alkaline) steps of strand synthesis and pre-PCR enrichment by DNA polymerases
‡ modified from manufacturer’s protocol: at the end of 90 min BS conversion at 65°C heated up to 95°C for 2 min, followed by 20 min more at 65°C.
Abbreviations:
Pfu Turbo Cx - abbreviated from PfuTurbo Cx Hotstart DNA Polymerase (Agilent Technologies)
Hot Start Taq - abbreviated from Hot Start Taq polymerase (TaKaRa, Tokyo, Japan)
JumpStart Taq - abbreviated from JumpStart Taq DNA Polymerase (Sigma-Aldrich)
KAPA HiFi - abbreviated from KAPA HiFi HotStart DNA ReadyMix (KAPA Biosystems)
KAPA HiFi Uracil+ - abbreviated from KAPA HiFi HotStart Uracil+ ReadyMix (KAPA Biosystems)
FailSafe - abbreviated from FailSafe PCR System (Epicentre/Illumina)

## Sheet: Datasets usage per analysis
Summary of libraries used, their count (technical replicates) in different analyses and analyses limitations for different species.
White background marks pre-bisulfite protocols, light blue – post-bisulfite, and light pink – non-BS converted control datasets.
Method	Species	Dinucleotide coverage	mtDNA coverage	Major satellite coverage	Telomere coverage	mESC feature methylation	Global absolute and relative methylation
Analysis limitations	>>>>>>>>>>>>>>>>	All species	Mouse and human†	Mouse	Some species‡	mESC only§	sperm, ESC, oocyte, blastocyst
'Heat' Set 1	Mouse and hamster	20	13	13	13	4	-
'Heat' Set 2	Mouse	-	-	-	-	-	30
'Heat KAPA'	Mouse and human	38	31	27	31	12	-
'Alkaline'	Mouse	18	18	18	18	2	-
'Alkaline KAPA'	Ant	7	-	-	-	-	-
'Am-BS'	Ant and Oyster	14	-	-	8	-	-
'PBAT'	Mouse and human	51	51	34	36	2	4
'ampPBAT'	Mouse	23	23	23	23	2	-
'EpiGnome'	Mouse and human	14	14	3	14	3	-
'non-BS control'	Mouse	9	9	9	9	-	-
Figures	>>>>>>>>>>>>>>>>	Fig.2a; Fig.S3a	Fig.1b; Fig.S3b	Fig.1b; Fig.S3b	Fig.1b,c; Fig. S1b; Fig.S3c	Fig.3d(WT); Fig.4e; Fig. 5a-c; Fig. S5c; Fig. S6a,b; Fig. S7a-c	Fig. 5d,e; Fig. S6c; Fig. S8
† due to the high sequence conservation the mtDNA coverage test will most likely be applicable for a wider variety of species; however it was limited here to mouse and human for practical reasons.
‡ applicable for species with telomere sequence similar to mammalian
§ only WT mESC data replicates are listed here; for TKO WGBS analyses refer to Tab 1 in this file
